# Supplementary material
Source: MDPI journal article supplement (https://www.mdpi.com/search?q=insects-12-00188)
Supplement: s001 [file insects-12-00188-s001.pdf]

**Table S1.** Insecticides used in Lost Hills 2006-2011 – 2 puffer/ac vs 1 puffer/ac vs Insecticides comparisons. All Conv and MD+Conv blocks (CMD) were treated with insecticides for NOW. Essentially two spray of Intrepid/year. All applications were Intrepid @18oz/ac +16 oz exit, 200 gals/ac

|                                                                                                                                                                                                                                                                                                          |
|----------------------------------------------------------------------------------------------------------------------------------------------------------------------------------------------------------------------------------------------------------------------------------------------------------|
| 2006 - 2 Intrepid appls. @18oz/ac +16 oz exit, 200 gals/ac<br>1 <sup>st</sup> spray @ 150 DD 1 <sup>st</sup> flight on April 24 – 28. + Abamectin + oil<br>2 <sup>nd</sup> spray @ 250 DD 2 <sup>nd</sup> flight in Mid- June was planned but actually applied July 5-7 @ 400 dd 2 <sup>nd</sup> flight. |
| 2007 -2 Intrepid appls @18oz/ac +16 oz exit, 200 gals/ac<br>1 <sup>st</sup> on@ 450 DD 1 <sup>st</sup> flight (May 3-5) + Abamectin + oil<br>2 <sup>nd</sup> @ 325 DD 2 <sup>nd</sup> flight (June 26).                                                                                                  |
| 2008 - 2 Intrepid applications @18oz/ac +16 oz exit, 200 gals/ac<br>1 <sup>st</sup> on April 26-28 + Abamectin + oil<br>2 <sup>nd</sup> on July 2-5 + 32 oz Fujimite R345                                                                                                                                |
| 2009 - 2 Intrepid applications @18oz/ac +16 oz exit, 200 gals/ac<br>1 <sup>st</sup> on April 13-15 + Abamectin + oil<br>2 <sup>nd</sup> on June 26 – July 2 + 32 oz Fujimite R345                                                                                                                        |
| 2010 - 2 Intrepid applications @18oz/ac +16 oz exit, 200 gals/ac<br>1 <sup>st</sup> on April 26-28 + Abamectin + oil<br>2 <sup>nd</sup> on July 6-12 + 32 oz Fujimite R345                                                                                                                               |
| 2011 - 2 Intrepid applications @18oz/ac +16 oz exit, 200 gals/ac<br>1 <sup>st</sup> on April 27-30 + Abamectin + oil<br>2 <sup>nd</sup> on July 11-16 + 32 oz Fujimite R345                                                                                                                              |

**Table S2.** Insecticide applications and their active ingredient (AI) in the orchard treatment areas (Conventional (C), and Conventional + Mating Disruption C+MD) targeting, or with an impact on, navel orangeworm (NOW) moths for growing seasons in 2012 through 2015.

| Year | Target Pest | AI                               | AI /ha               | Application Date | DD <sup>1</sup> from Jan 1 |
|------|-------------|----------------------------------|----------------------|------------------|----------------------------|
| 2012 | NOW         | Methoxyfenozide <sup>2</sup>     | 0.31 kg              | 5/9              | 344 (652)                  |
| 2012 | NOW         | Methoxyfenozide <sup>2</sup>     | 0.31 kg              | 7/9              | 927 (1700)                 |
| 2013 | NOW         | Methoxyfenozide <sup>2</sup>     | 0.31 kg              | 4/20             | 168 (335)                  |
| 2013 | NOW         | Methoxyfenozide <sup>2</sup>     | 0.31 kg              | 6/28             | 814 (1498)                 |
| 2013 | NOW         | Bifenthrin <sup>3</sup>          | 0.09 kg              | 7/29             | 1256 (2293)                |
| 2014 | NOW         | Methoxyfenozide <sup>2</sup>     | 0.43 kg              | 4/15             | 317 (602)                  |
| 2014 | NOW         | Methoxyfenozide <sup>2</sup>     | 0.43 kg              | 6/27             | 969 (1777)                 |
| 2014 | NOW         | Bifenthrin <sup>3</sup>          | 0.09 kg <sup>4</sup> | 7/9              | 1413 (2575)                |
| 2015 | Plant bugs  | Lambda-cyhalothrin <sup>5</sup>  | 0.045 kg             | 4/17             | 321 (609)                  |
| 2015 | NOW         | Methoxyfenozide <sup>2</sup>     | 0.43 kg              | 6/26             | 930 (1706)                 |
| 2015 | NOW         | Chlorantraniliprole <sup>6</sup> | 0.11 kg              | 7/20             | 1247 (2276)                |

|      |     |                         |         |      |             |
|------|-----|-------------------------|---------|------|-------------|
| 2015 | NOW | Bifenthrin <sup>7</sup> | 0.22 kg | 7/20 | 1247 (2276) |
|------|-----|-------------------------|---------|------|-------------|

---

<sup>1</sup>Degree days of navel orangeworm in Celsius (Fahrenheit).

<sup>2</sup>Intrepid 2 F, Dow AgroSciences, Indianapolis, IN, USA.

<sup>3</sup>Bifenture, United Phosphorus, Inc., King of Prussia, PA, USA.

<sup>4</sup>Sprayed alternate rows, 50% of orchard sprayed.

<sup>5</sup>Warrior II, Syngenta Crop Protection, LLC, Greensboro, NC, USA.

<sup>6</sup>Altacor, DuPont Crop Protection, Newark, DE, USA.

<sup>7</sup>Brigade WSB, FMC Corp. Agricultural Products Group, Philadelphia. PA, USA.
